# Supplementary material for: Beyond Taste: Unpacking Consumer Perceptions of Plant-Based Cheese Alternatives in Uruguay Through Sensory, Information, and Expectation Analysis
Source: Research Square preprint supplement (doi:10.21203/rs.3.rs-8703177/v1), 2026-02-11
Supplement: Supplementary file 1 [file 3c400eb3d85c9dd4e0266f81.docx]

**Beyond Taste: Unpacking Consumer Perceptions of Plant-Based Cheese Alternatives in Uruguay Through Sensory, Information, and Expectation Analysis**

Cinu Varghese 2*, Celina Sosa 1, Julieta Maique 1, Ana Curutchet1,2, Patricia Arcia1,2

1 Department of Engineering, Universidad Católica del Uruguay, Montevideo 11600, Uruguay

2 Latitud - Laboratorio Tecnológico del Uruguay (LATU Foundation), Montevideo 11500, Uruguay

* Corresponding author: Cinu Varghese, [getcinuvarghese@gmail.com](mailto:getcinuvarghese@gmail.com) , ORCID: 0000-0002-0119-3735

**Materials and Methods**

**Experimental Design**

|  | **PB1** | **PB2** | **PB3** | **DB** |
| --- | --- | --- | --- | --- |
| Ingredients | Water, coconut oil, cashews, psyllium, salt, lactic cultures (vegetable-based) | Filtered water, vegetable oil (butiá), premix (starch, modified starches, xanthan gum), salt, natural flavoring. | Water, vegetable oil (coconut oil and rape oil), modified potato starch, salt, coloring: INS 270, natural flavoring | Pasteurized milk, lactic cultures, salt (sodium chloride), calcium chloride (INS 509), and coagulant enzymes. |
| **Nutritional information** | | | | |
| Portion (g) | 30 | 30 | 30 | 30 |
| Energy (kcal) | 52 | 95 | 83 | 94 |
| Carbohydrate (g) | 1.2 | 14.8 | 5.1 | - |
| Proteins (g) | 3 | 0.1 | - | 7.3 |
| Total fats | 9.33 | 8 | 6.9 | 7.2 |
| Saturated fats | 4.3 | 6.6 | 4.2 | 4.4 |
| Trans fat (g) |  | - | - | 0.4 |
| Fiber |  | 0.2 | - | - |
| Sodium(mg) | 150 | 118 | 144 | 176 |
| Country of origin | Uruguay | Uruguay | Denmark | Uruguay |

The experimental design comprised three sessions: blind, informed, and expectation. In the blind session (n = 110), the participants tasted the samples in a randomized order. In the informed session, the same participants (n = 110) received product information (packaging labels and nutritional information; Supplementary Materials 2, Fig. S1) concurrently with the tasting of the samples. The blind and informed sessions were completed by the same participants on separate days, with a minimum of 24 hours between sessions to minimize carry-over effects. The expected session (n = 236) was conducted as a survey using QualtricsTM software (2023, Provo, UT, USA), in which participants evaluated products based solely on the product information without tasting. A separate group of participants was recruited for the expectation session. The ingredient composition and nutritional information of the cheeses are presented in Table S1.

**Table S1** The ingredient composition and nutritional information of the selected samples

**Participants**

A total of 336 participants were evaluated in the three study sessions. Participants who self-reported as healthy adults and confirmed no known allergies or dietary restrictions (e.g., celiac disease, diabetes, or veganism) via a screening questionnaire were considered for the blind and informed sessions The gender distribution of the population was similar to that of the census (INE, 2023). There were 30% of the respondents were aged 18 to 35, 47% were aged 35 to 64, and 23% were aged 65 or older. The ethics committee of the Universidad Catolica del Uruguay (Solcomet 74) reviewed and approved the study, which was conducted with the informed consent of all subjects. Names and identification information about participants will not be recorded, so their identities will remain anonymous.

**Selection and Presentation of Samples**

Cheese products were selected based on their availability in local markets, nutritional profiles, and taste. Mozzarella cheese was selected for this study because it is widely consumed in Uruguay. During the study period, the selection of plant-based cheeses was limited to three, as no other suitable commercial alternatives were available in the Uruguayan market. A dairy-based mozzarella cheese from a leading brand was used as the control sample (DB). Three plant-based cheeses were also included: two labelled as “mozzarella-style” alternatives (PB2 and PB3), which were sensorially similar to the dairy-based cheese, and one analog (PB1), classified as such because of the presence of lactic culture in its ingredient list, which typically contributes to fermentation and specific flavor profiles distinct from direct alternatives [1]. Thus, plant-based cheeses were categorized as sensorially similar alternatives(PB2 and PB3)or as ananalog option (PB1). The samples were stored under refrigeration (4 °C) until sensory testing. On the day of testing, samples (7–10 g) were placed in plastic containers and served in individual sensory booths under controlled lighting and temperature conditions, coded with random three-digit numbers, and presented in a balanced sequence to minimize order effects. The participants received filtered water between samples to cleanse their palates.

**Preliminary sensory evaluation for selecting Check-all-that-apply (CATA) terms**

CATA terms were generated during a preliminary session with 12 food science experts. Consumer-friendly terms were selected based on their ability to describe and discriminate between the samples. Sensory attributes reflect the product properties of appearance, texture, and flavor. In addition to these intrinsic product descriptors, a set of non-sensory conceptual terms was included to capture consumer perceptions related to extrinsic cues such as health, processing, and product image. The terms were organized into four categories: health and nutrition, naturalness and processing, quality and value, and packaging and image. Furthermore, an extensive literature review was conducted to complement the terminology that would subsequently be provided to consumers in various sessions [2-6]. CATA questionnaires were applied differentially across sessions: sensory descriptors were used only in the blind session, while non-sensory conceptual terms were used only in the expected session (Supplementary Materials 2, Table S1). CATA was not utilized in the informed session.

**Data collection**

The blind and informed sessions were conducted in July 2024 with the same participants. The expected session was conducted online from July to August 2024. After tasting the samples in blind and informed sessions, the participants completed a questionnaire to assess their sensory perception and purchase intention. Overall acceptability was measured using a structured nine-point hedonic scale (1 = “dislike very much,” 5 = “neither like nor dislike,” 9 = “like very much”), and purchase intention was assessed using a seven-point scale (1 = “would definitely not buy,” 7 = “would definitely buy”).

In the expected session (survey), participants evaluated products based solely on extrinsic information, including packaging and nutritional information. Purchase intention was first assessed using a seven-point scale (1 = “would definitely not buy,” 7 = “would definitely buy”), consistent with the blind and informed sessions. To further capture consumer motivations, participants rated the perceived healthiness of the products on a seven-point scale (1 = “not at all healthy,” 7 = “completely healthy”). This measure was included to address growing consumer concerns regarding the health and nutrition perception of PBCAs [7]**.**

To extend the range of evaluative criteria, additional CATA terms related to trust, environmental sustainability, and consumption intention were incorporated (Supplementary Materials 2, Table S3).), including: “I would never consume a product like this,” “I do not trust these ingredients,” “It is good for the environment,” and “I could adopt this product for my regular consumption.” Sociodemographic data were also collected, including net monthly income, household composition, education level, place of residence, dietary habits (diet type and dietary restrictions), and frequency of consumption of dairy-based mozzarella cheese and plant-based cheese. These variables were subsequently used for consumer segmentation analyses to identify distinct consumer profiles based on demographics, dietary patterns and evaluative responses.

**Data analysis**

Two-way analysis of variance (ANOVA) was used to determine whether the hedonic scales of the PBCAs differed significantly. The Honest Significant Difference (HSD) test was conducted thereafter. Contingency tables were used to summarize the frequency of each descriptor. The Cochran Q test was used to compare the frequencies of each descriptor in the samples. In correspondence analysis (CA), chi-square distances were used to compare the attributes with cheese samples [8]. Penalty lift analysis (PLA) was calculated by comparing the mean overall liking scores for products when a specific attribute was selected (checked) by consumers and when it was not selected [9]. This identifies the attributes that significantly 'penalize' or 'lift' liking. Consumersegmentation was conducted using the purchase intention for the three plant-based cheeses along with the animal-based cheese purchase intention. An Agglomerative Hierarchical Clustering (AHC) analysis was performed based on Ward’s method and Euclidean distances. The dendrogram and relative increase in within-cluster variance were examined to determine the optimal number of clusters. Clusters were determined using scree plots and a minimum sample size of 50 people per cluster, adhering to the upper bound of the recommendation by Moskowitz (2020) [10], who found stable sensory consumer estimates with 40-50 participants."All analyses were conducted using XLSTAT (Version 2021.2, New York, N.Y., U.S.A.). We used a significance level of 5% for all analyses (p <0.05).

**References**

1. Short, E. C., Kinchla, A. J., & Nolden, A. A. (2021). Plant-based cheeses: A systematic review of sensory evaluation studies and strategies to increase consumer acceptance. In Foods (Vol. 10, Issue 4). MDPI AG. https://doi.org/10.3390/foods10040725
2. Adamczyk, D., Jaworska, D., Affeltowicz, D., & Maison, D. (2022). Plant‐Based Dairy Alternatives: Consumers’ Perceptions, Motivations, and Barriers—Results from a Qualitative Study in Poland, Germany, and France. Nutrients, 14(10). https://doi.org/10.3390/nu14102171
3. Cardello, A. V., Llobell, F., Giacalone, D., Chheang, S. L., & Jaeger, S. R. (2022). Consumer Preference Segments for Plant-Based Foods: The Role of Product Category. Foods, 11(19). https://doi.org/10.3390/foods11193059
4. Jaeger, S. R., Roigard, C. M., Le Blond, M., Hedderley, D. I., & Giacalone, D. (2019). Perceived situational appropriateness for foods and beverages: consumer segmentation and relationship with stated liking. Food Quality and Preference, 78, 103701. <https://doi.org/10.1016/J.FOODQUAL.2019.05.001>
5. Jaeger, S. R., Cardello, A. V., Jin, D., Ryan, G. S., & Giacalone, D. (2023). Consumer perception of plant-based yoghurt: Sensory drivers of liking and emotional, holistic and conceptual associations. Food Research International, 167, 112666. <https://doi.org/10.1016/J.FOODRES.2023.112666>
6. Jaeger, S.R.; Jin, D.; Roigard, C.M. Plant-Based Alternatives Need Not Be Inferior: Findings from a Sensory and Consumer Research Case Study with Cream Cheese. Foods 2024, 13, 567. <https://doi.org/10.3390/foods13040567>
7. Runte, M., Guth, J. N., & Ammann, J. (2024). Consumers’ perception of plant-based alternatives and changes over time. A linguistic analysis across three countries and ten years. Food Quality and Preference, 113, 105057. <https://doi.org/10.1016/J.FOODQUAL.2023.105057>
8. Vidal, L., Tárrega, A., Antúnez, L., Ares, G., & Jaeger, S. R. (2015). Comparison of Correspondence Analysis based on Hellinger and chi-square distances to obtain sensory spaces from check-all-that-apply (CATA) questions. Food Quality and Preference, 43. <https://doi.org/10.1016/j.foodqual.2015.03.003>
9. Meyners, M., Castura, J. C., & Carr, B. T. (2013). Existing and new approaches for the analysis of CATA data. Food Quality and Preference, 30(2). <https://doi.org/10.1016/j.foodqual.2013.06.010>
10. Moskowitz, H. (2020). Food and Drink: Thoughts on Base Size in Sensory and Consumer Research. Edelweiss Applied Science and Technology, 4(1), 37–40. https://doi.org/10.33805/2576-8484.177
