# Supplementary material for: Beyond Taste: Unpacking Consumer Perceptions of Plant-Based Cheese Alternatives in Uruguay Through Sensory, Information, and Expectation Analysis
Source: Research Square preprint supplement (doi:10.21203/rs.3.rs-8703177/v1), 2026-02-11
Supplement: Supplementary file 2 [file a7dcb66438e3a59f5248e35b.docx]

**Supplementary Materials 2**

**PB1**


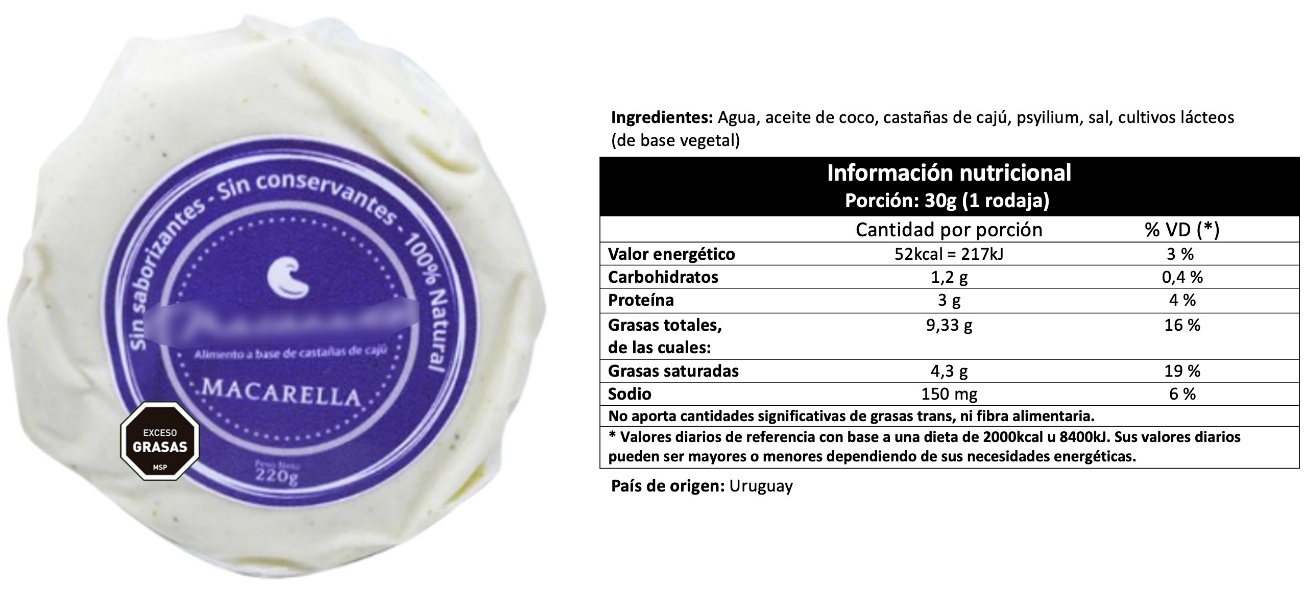


**PB2**


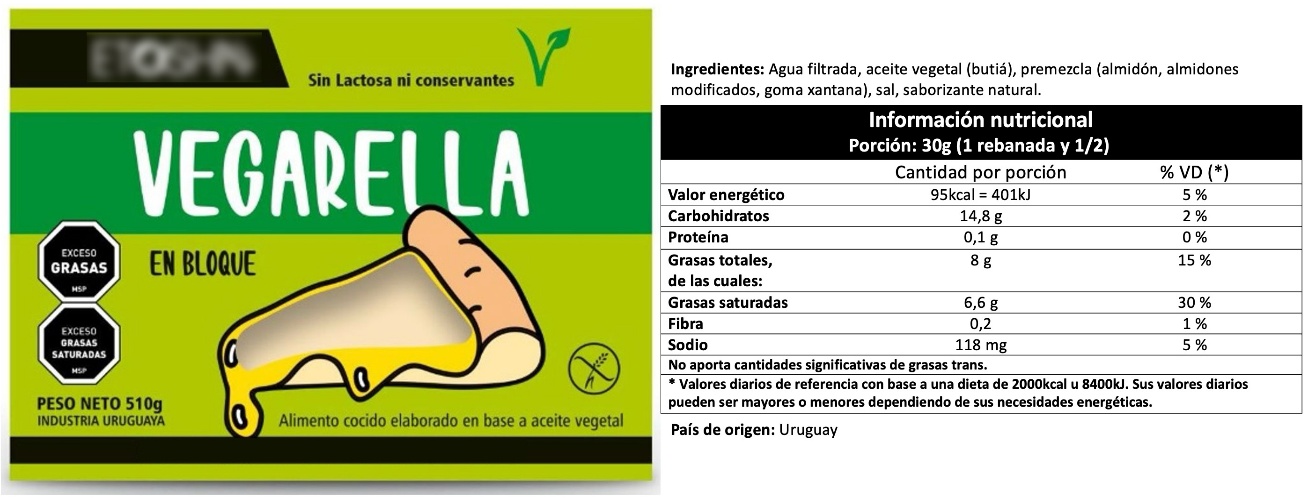


**PB3**

**
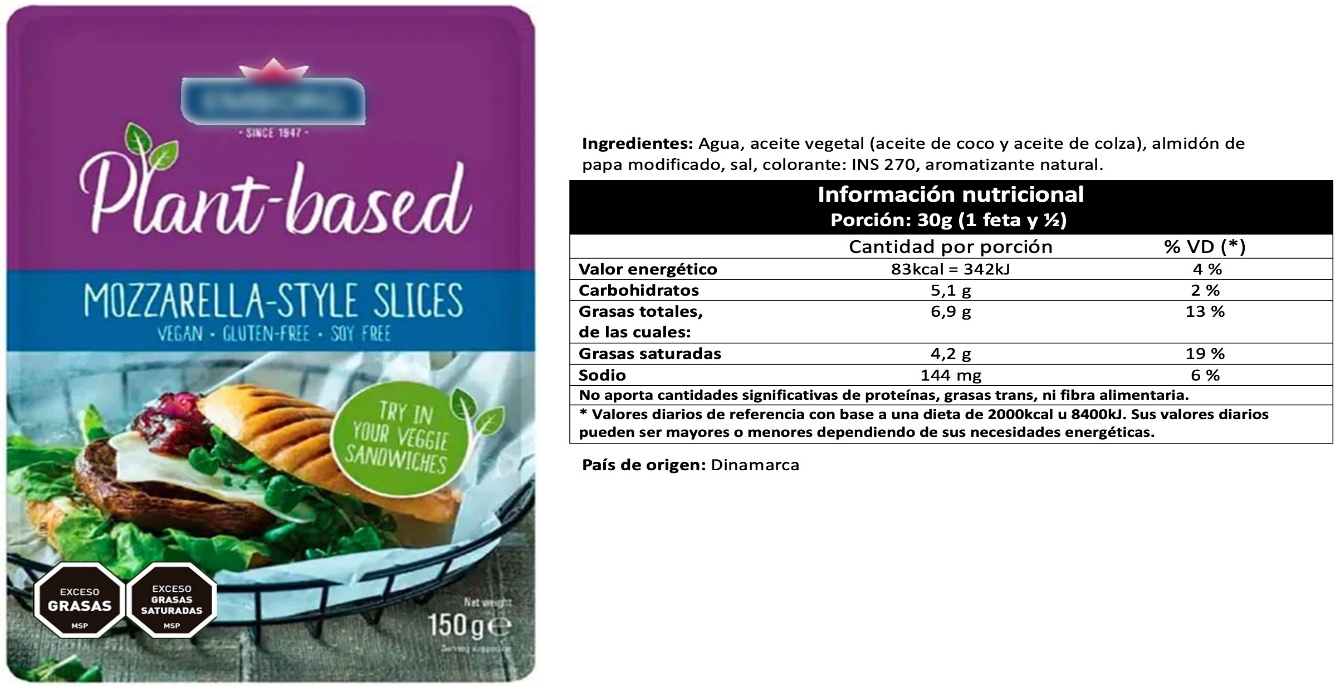
**

**DB**

**
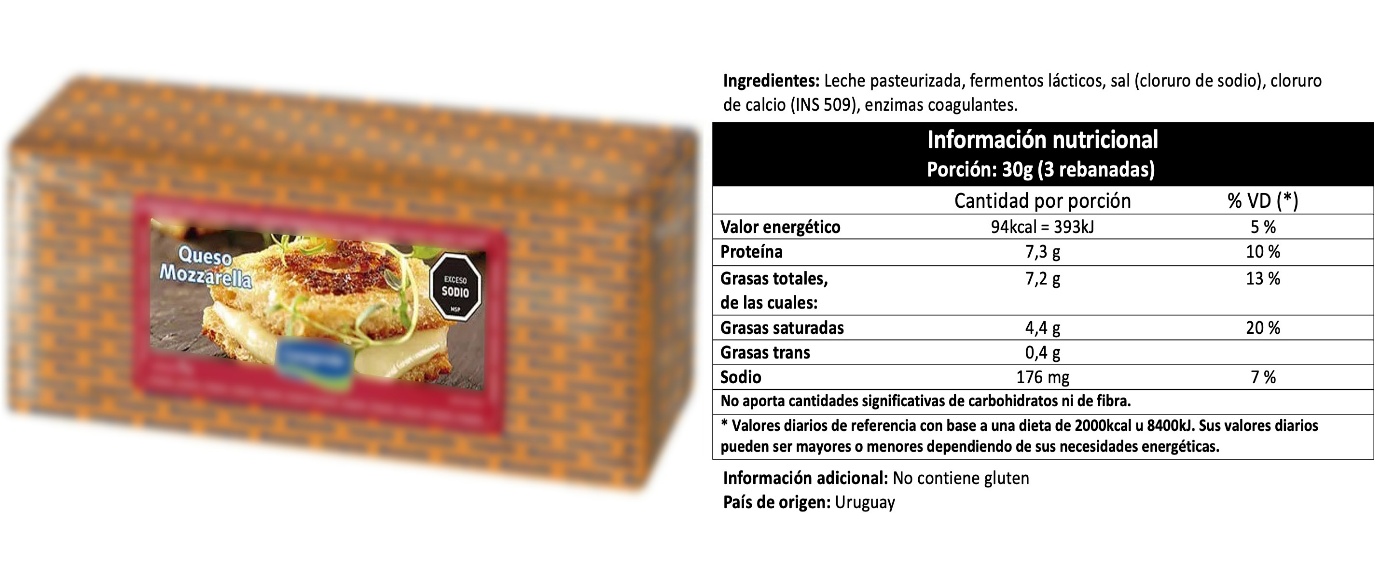
**

**Fig. S1** Samples and information provided to the consumers in Informed and Expected Conditions.

Table S1. Proportion of citation frequency of CATA terms in blind condition

| **Blind condition** | | | | |
| --- | --- | --- | --- | --- |
|  | *PB1* | *PB2* | *PB3* | *DB* |
| Oily | 7.3b | 6.0ab | 3.9a | 2.8a |
| Artificial flavour | 6.0ab | 13.3c | 10.6bc | 2.6a |
| Bland/mild flavour | 9.3c | 7.0ab | 9.2bc | 3.1a |
| Shiny | 0.3a | 1.7a | 3.5a | 6.8b |
| Strong aftertaste | 8.5b | 8.6b | 1.8a | 2.3a |
| Creamy | 10.9b | 4.7a | 1.8a | 11.4b |
| Smooth mouthfeel | 5.2a | 6.3a | 7.4a | 18.5b |
| Firm | 1.6a | 8.6b | 12.4c | 8.5b |
| Chewy | 2.6a | 5.3ab | 7.4ab | 8.2b |
| Bitter | 2.6ns | 3.7ns | 2.5ns | 1.4ns |
| Elastic | 2.6ab | 2.0a | 4.2ab | 5.7b |
| Salty | 3.9ab | 3.3a | 4.9ab | 7.7b |
| Tasteless | 3.4a | 7.0ab | 13.4b | 2.6a |
| Acidic | 5.4b | 1.3a | 0.4a | 1.1a |
| Cereal flavour | 0.5ns | 1.7ns | 2.1ns | 0.3ns |
| Rubbery | 7.0b | 1.3a | 4.6a | 3.1a |
| Gritty | 4.4b | 2.3ab | 1.8a | 2.6ab |
| Soft | 14.8d | 6.6b | 2.5a | 9.7c |
| Nutty flavour | 0.8ns | 2.0ns | 2.8ns | 0.9ns |
| Vegetable flavour | 3.1ab | 7.3b | 2.8a | 0.9a |

Values are citation frequencies (%). Cochran’s Q test was used for inference testing. a,b,c Within the same condition, attributes with different letters in a row, are significantly different (p ≤ 0.05 -Cochran’s Q test)..

Table S2. Summary of participant characteristics (%) based on the cluster and aggregate level

|  | **Cluster 1 (%)** | **Cluster 2 (%)** | **Aggregate (%)** |
| --- | --- | --- | --- |
|  | *(n=176)* | *(n=60)* | *(n=236)* |
| **Gender** |  |  |  |
| Male | 27 | 28 | 28 |
| Female | 73 | 72 | 72 |
| **Age** |  |  |  |
| 18-34 | 55 | 38 | 47 |
| 35-44 | 11 | 12 | 12 |
| 45-54 | 16 | 13 | 15 |
| >54 | 18 | 37 | 27 |
| **Family size** |  |  |  |
| 1 | 40 | 23 | 32 |
| 2-3 | 40 | 50 | 45 |
| 4-5 | 9 | 13 | 11 |
| >5 | 11 | 13 | 12 |
| **Household income (UYU)** |  |  |  |
| Under $45.000 | 15 | 18 | 17 |
| Between $45000 y $90000 | 41 | 37 | 39 |
| Between $90000 y $160000 | 22 | 32 | 27 |
| More than $160000 | 22 | 13 | 17 |
| **Education** |  |  |  |
| Incomplete secondary school | 5 | 3 | 4 |
| Completed secondary school | 11 | 3 | 7 |
| Incomplete university | 49 | 47 | 48 |
| Completed university | 26 | 33 | 30 |
| Postgraduate | 9 | 13 | 11 |
| **Residence place** |  |  |  |
| Another place | 55 | 48 | 52 |
| Montevideo | 45 | 52 | 48 |
| ***Consumption frequency** | |  |  |
| Daily | 10 | 13 | 12 |
| Once a week | 49 | 52 | 51 |
| Once a month | 33 | 33 | 33 |
| More than once a week | 5 | 2 | 3 |
| Never | 2 | 0 | 1 |
| **Diet** |  |  |  |
| Omnivore | 62 | 60 | 61 |
| low carb | 3 | 10 | 6 |
| other | 28 | 22 | 25 |
| Flexitarian | 2 | 3 | 3 |
| Vegetarian | 4 | 2 | 3 |
| Keto | 1 | 2 | 1 |
| **Food restrictions** |  |  |  |
| Celiac | 2 | 0 | 1 |
| Diabetic | 4 | 2 | 3 |
| Lactose intolerant | 5 | 0 | 2 |
| Other | 13 | 12 | 12 |
| No restrictions | 76 | 87 | 81 |

*Consumption frequency of dairy based mozzarella cheese is shown in the table.

Table S3. Contingency table from the CATA data of the product expectation survey

|  | **Cluster 1 (Adopters)** | | | |  | **Cluster 2 (Non adopters)** | | | | |
| --- | --- | --- | --- | --- | --- | --- | --- | --- | --- | --- |
| **CATA** | *PB1* | *PB2* | *PB3* | *DB* | *p value* | *PB1* | *PB2* | *PB3* | *DB* | *p value* |
| Tempting | 49 | 18 | 59 | 89 | <0.0001 | 20 | 3 | 2 | 13 | <0.0001 |
| Unattractive | 12 | 96 | 34 | 13 | <0.0001 | 11 | 36 | 39 | 20 | <0.0001 |
| Neat | 70 | 43 | 86 | 94 | <0.0001 | 26 | 9 | 5 | 20 | <0.0001 |
| Artificial image | 6 | 79 | 56 | 25 | <0.0001 | 9 | 9 | 33 | 25 | <0.0001 |
| Boring | 33 | 15 | 11 | 13 | 0.000 | 6 | 16 | 13 | 7 | 0.038 |
| Good quality | 80 | 18 | 39 | 107 | <0.0001 | 18 | 3 | 2 | 6 | <0.0001 |
| Healthy | 62 | 32 | 48 | 18 | <0.0001 | 7 | 9 | 4 | 1 | 0.058 |
| Expensive | 50 | 45 | 71 | 20 | <0.0001 | 5 | 9 | 11 | 18 | 0.007 |
| High in protein | 20 | 6 | 10 | 22 | 0.003 | 7 | 0 | 2 | 3 | 0.005 |
| Cheap | 7 | 3 | 0 | 8 | 0.024 | 3 | 4 | 3 | 1 | 0.580 |
| Processed | 19 | 63 | 58 | 59 | <0.0001 | 26 | 18 | 30 | 25 | 0.060 |
| Imitation | 11 | 30 | 18 | 1 | <0.0001 | 0 | 3 | 9 | 7 | 0.005 |
| Natural | 12 | 5 | 4 | 4 | 0.015 | 2 | 4 | 0 | 0 | 0.062 |
| Vegan | 36 | 83 | 65 | 1 | <0.0001 | 0 | 10 | 24 | 19 | <0.0001 |
| Excess fat | 51 | 47 | 48 | 39 | 0.319 | 19 | 19 | 25 | 23 | 0.374 |
| Artisanal | 62 | 12 | 3 | 2 | <0.0001 | 1 | 9 | 1 | 0 | 0.000 |
| Pleasant packaging | 38 | 18 | 53 | 41 | <0.0001 | 10 | 8 | 3 | 11 | 0.127 |
| National | 80 | 37 | 4 | 114 | <0.0001 | 26 | 7 | 3 | 0 | <0.0001 |
| I believe it is not nutritious | 24 | 26 | 9 | 68 | <0.0001 | 11 | 1 | 1 | 1 | <0.0001 |
| I would never consume a product like this | 18 | 16 | 15 | 24 | 0.362 | 4 | 2 | 2 | 0 | 0.261 |
| It is good for the environment | 0 | 7 | 28 | 13 | <0.0001 | 3 | 10 | 14 | 13 | 0.005 |
| I could adopt this product for my regular consumption | 11 | 15 | 39 | 25 | <0.0001 | 11 | 14 | 24 | 18 | 0.008 |

Cochran’s Q test was used for inference testing. p value < 0.05 indicate statistically significant.
